# Supplementary material for: Substitution effect on the photochromic properties of benzo[b]thiophene-1,1-dioxide based diarylethenes
Source: Royal Society of Chemistry journal article supplement (doi:10.1039/c5ra18116j), 2015-01-01
Supplement: c5ra18116j1.pdf [file c5ra18116j1.pdf]

*Electronic Supplementary Information (ESI)*

## **Substitution effect on photochromic properties of benzo[*b*]thiophene-1,1-dioxide based diarylethenes**

**Shangjun Chen,<sup>a</sup> Wenlong Li,<sup>b</sup> Xin Li<sup>c</sup> and Wei-Hong Zhu<sup>\*b</sup>**

<sup>a</sup> *Department of chemistry, Shanghai Normal University, Shanghai, 200234, P. R. China.*

<sup>b</sup> *Shanghai Key Laboratory of Functional Materials Chemistry, Key Laboratory for Advanced Materials and Institute of Fine Chemicals, Collaborative Innovation Center for Coal Based Energy (i-CCE), Shanghai 200237, East China University of Science and Technology, Shanghai 200237, P.R. China, E-mail: whzhu@ecust.edu.cn*

<sup>c</sup> *Division of Theoretical Chemistry and Biology, School of Biotechnology, KTH Royal Institute of Technology, SE-10691 Stockholm, Sweden.*

### **Contents**

|                                                                                                                           |    |
|---------------------------------------------------------------------------------------------------------------------------|----|
| <b>Scheme S1</b> Synthetic routes for BTT-1, BTT-2, and BTT-4.....                                                        | S1 |
| <b>Fig. S1</b> Simulated absorption spectra of BTT-1 to BTT-4.....                                                        | S2 |
| <b>Table S1</b> The frontier orbitals of BTT-1 to BTT-4.....                                                              | S3 |
| <b>Table S2</b> Computed self-consistent field energies for BTT-1 to BTT-4.....                                           | S4 |
| <b>Table S3</b> Crystal data of BTT-1, BTT-2, and BTT-3.....                                                              | S4 |
| <b>Fig. S2</b> ORTEP drawings of BTT-1, BTT-2 and BTT-4 showing 50% probability displacement ellipsoids.....              | S5 |
| <b>Fig. S3</b> Fatigue resistance behaviour of the PMMA films.....                                                        | S6 |
| <b>Fig. S4</b> Fluorescence spectra of BTT-2 and BTT-3.....                                                               | S7 |
| <b>Fig. S5-S16</b> NMR ( <sup>1</sup> H, <sup>13</sup> C) spectra and high resolution mass spectra of BTT-1 to BTT-4..... | S8 |

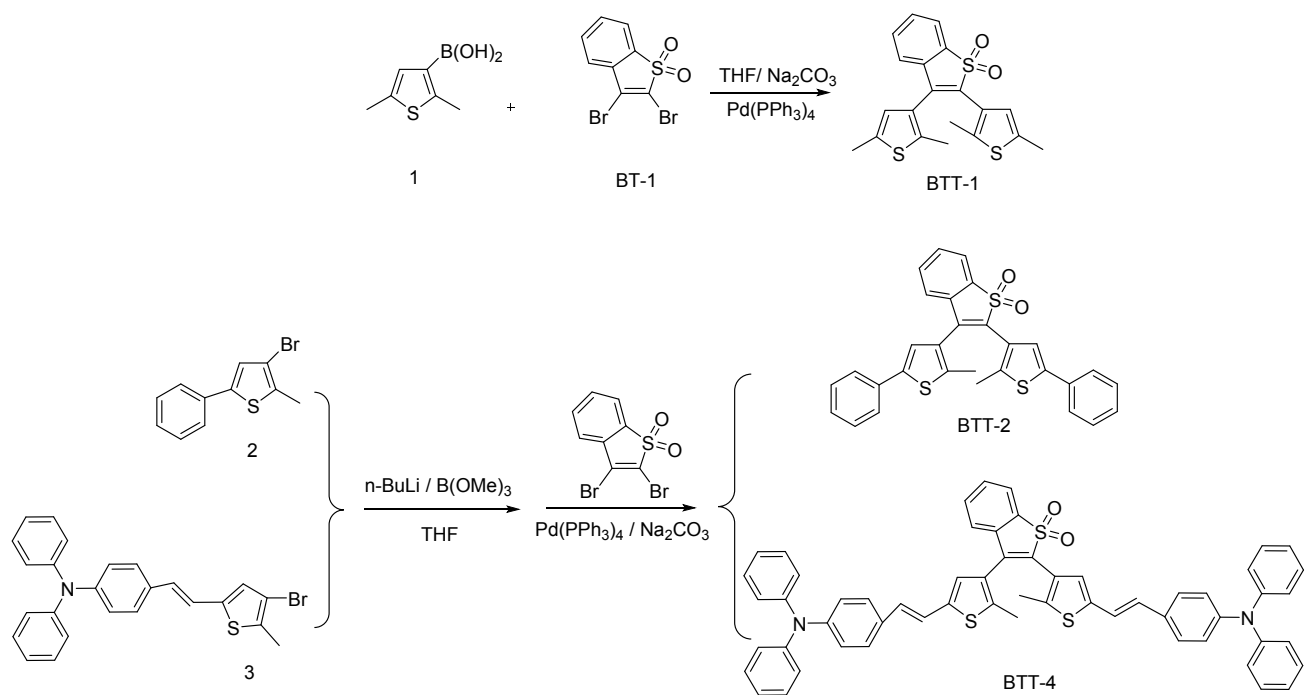

**Scheme S1** Synthetic routes for the photochromic compounds BTT-1, BTT-2, and BTT-4

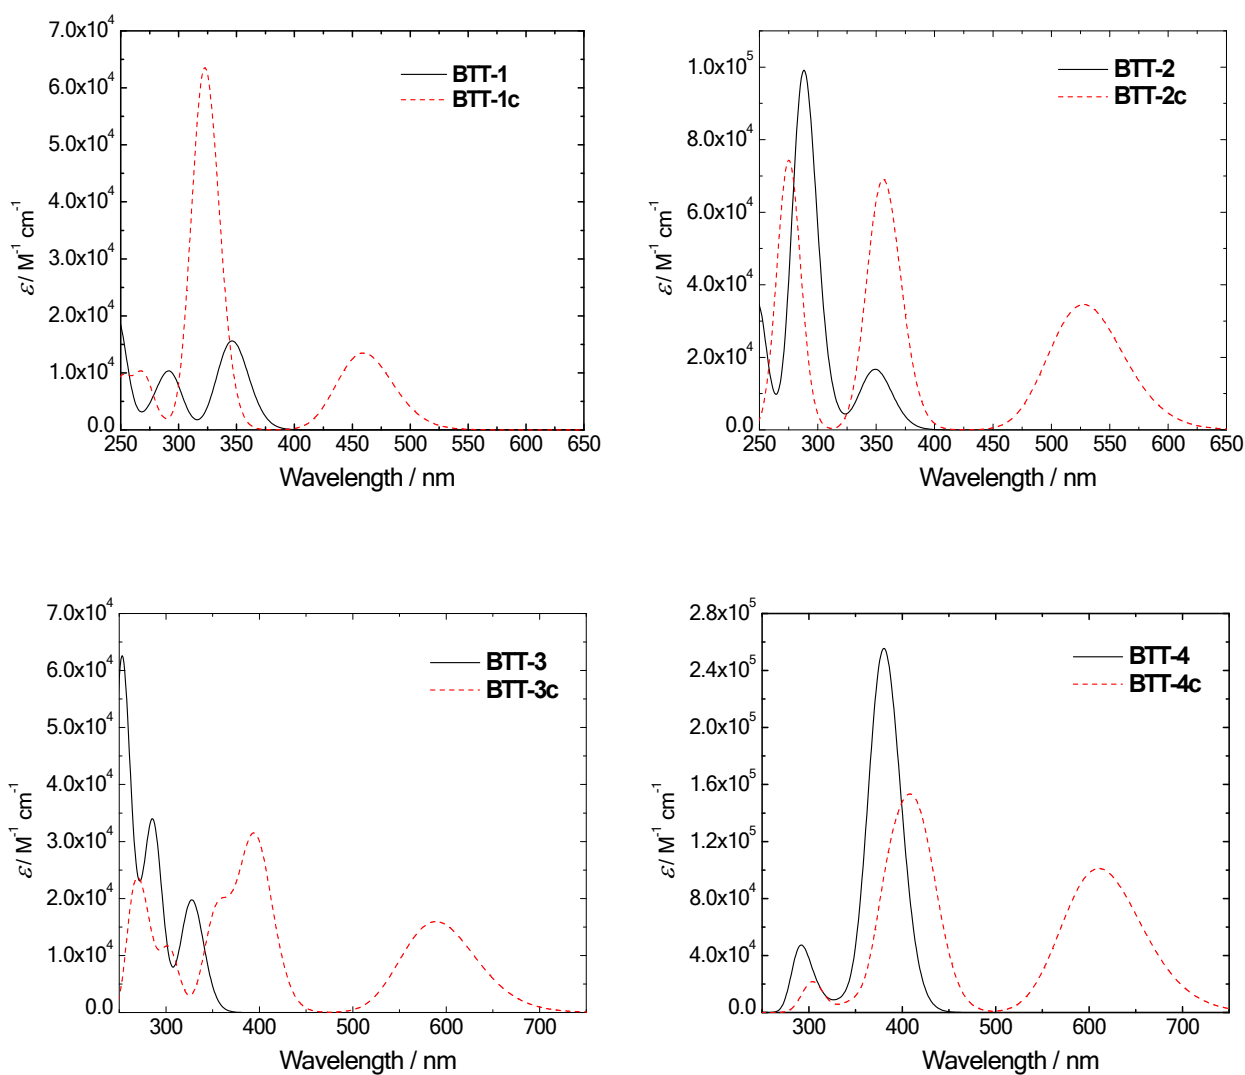

**Fig. S1** Simulated absorption spectra of the photochromic molecules BTT-1 to BTT-4:  $\lambda_{\text{max}} = 250, 458 \text{ nm}$  for BTT-1 and BTT-1c;  $\lambda_{\text{max}} = 288, 529 \text{ nm}$  for BTT-2 and BTT-2c;  $\lambda_{\text{max}} = 253, 592 \text{ nm}$  for BTT-3 and BTT-3c;  $\lambda_{\text{max}} = 378, 611 \text{ nm}$  for BTT-4 and BTT-4c.

**Table S1** The frontier orbitals of compounds BTT-1 to BTT-4 (isovalue = 0.04 a.u.)

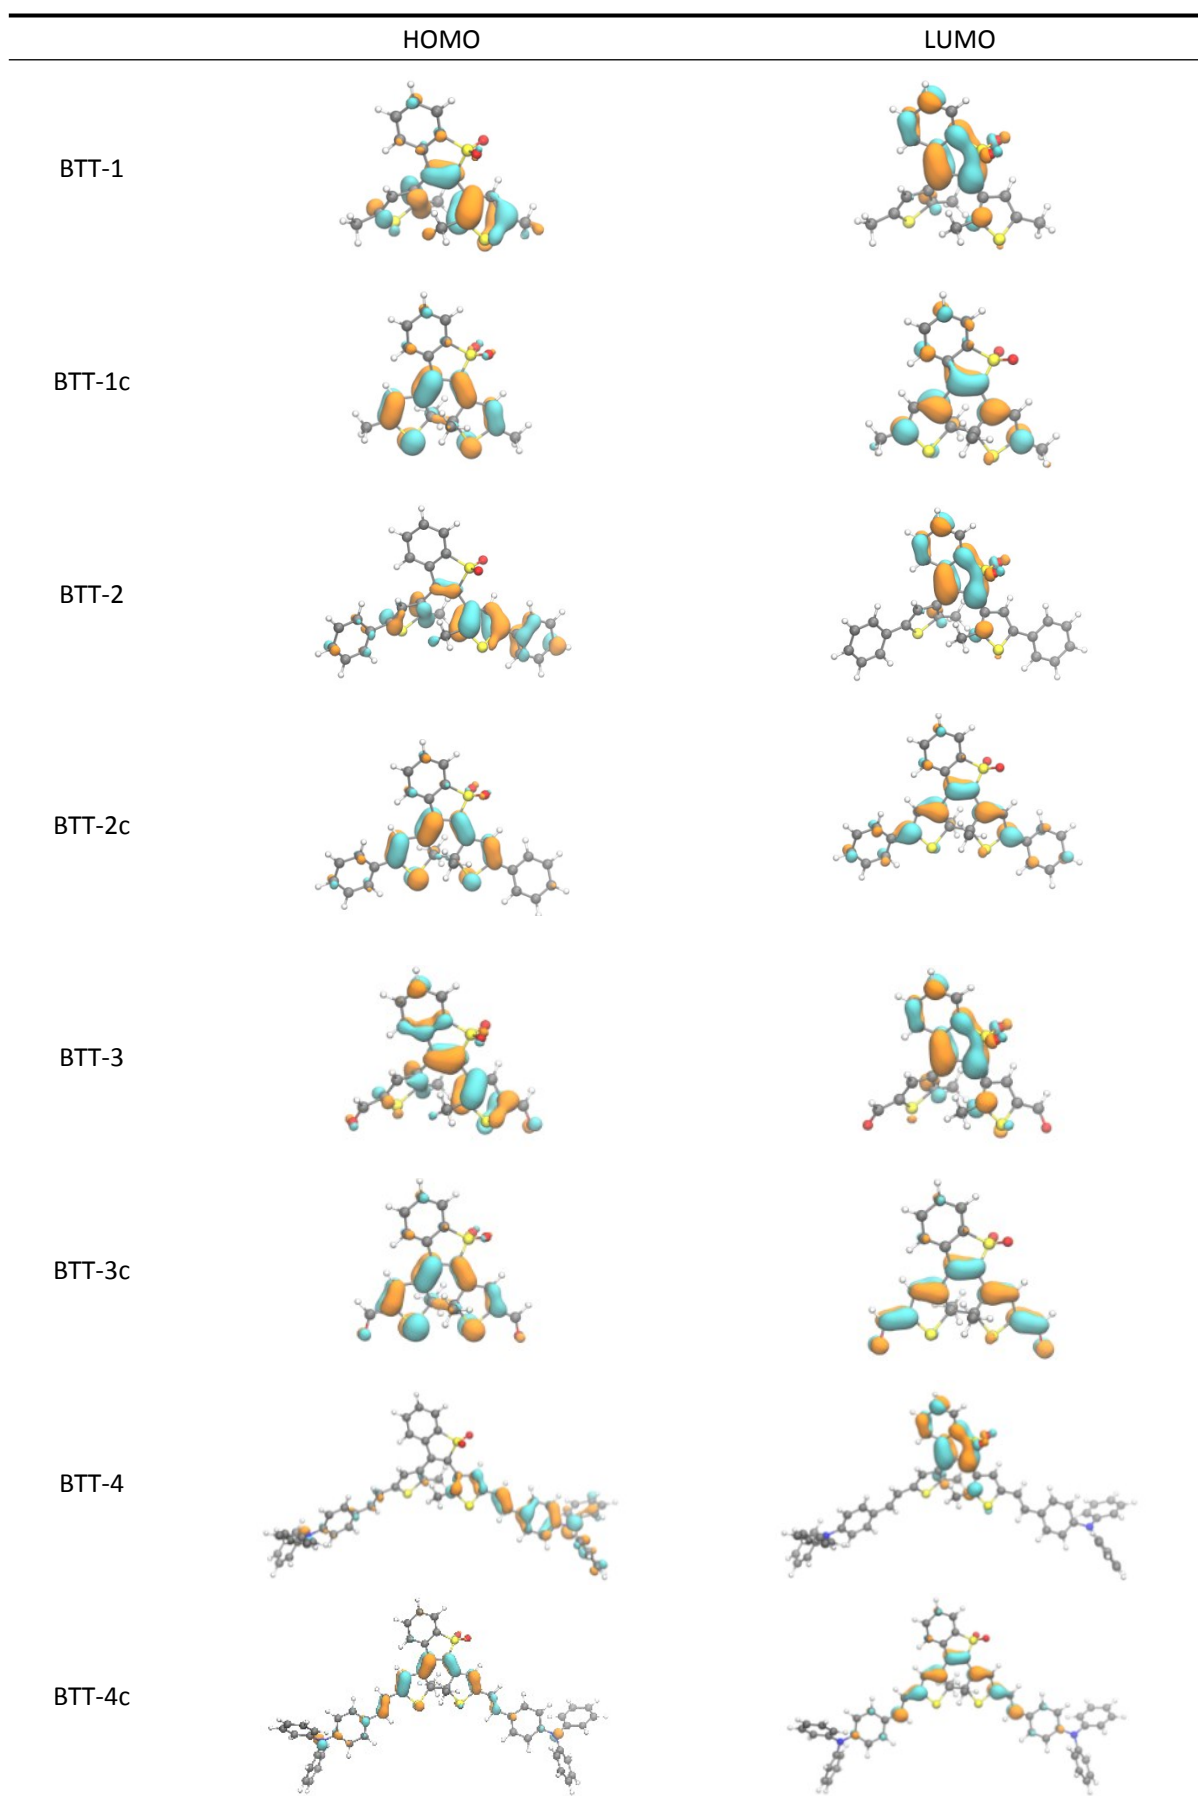

**Table S2** Computed self-consistent field energies for the photochromic molecules.

| Compound | open-ring isomer    | closed-ring isomer  | energy difference   |
|----------|---------------------|---------------------|---------------------|
| BTT-1    | -2118.05608805 a.u. | -2118.04609003 a.u. | -26.2 kJ/mol        |
| BTT-2    | -2501.58660643 a.u. | -2501.57554288 a.u. | -29.0 kJ/mol        |
| BTT-3    | -2266.06466067 a.u. | -2266.04126384 a.u. | <b>-61.4 kJ/mol</b> |
| BTT-4    | -3691.46746019 a.u. | -3691.46254823 a.u. | -22.9 kJ/mol        |

**Table S3** Crystal data of BTT-1, BTT-2, and BTT-3

|                                    | Compound                                                      |                                                               |                                                               |
|------------------------------------|---------------------------------------------------------------|---------------------------------------------------------------|---------------------------------------------------------------|
|                                    | BTT-1                                                         | BTT-2                                                         | BTT-3                                                         |
| Formula                            | C <sub>20</sub> H <sub>18</sub> O <sub>2</sub> S <sub>3</sub> | C <sub>30</sub> H <sub>22</sub> O <sub>2</sub> S <sub>3</sub> | C <sub>20</sub> H <sub>14</sub> O <sub>4</sub> S <sub>3</sub> |
| Formula weight                     | 386.55                                                        | 510.66                                                        | 414.49                                                        |
| Temperature                        | 293 K                                                         | 573 k                                                         | 166 K                                                         |
| Crystal system                     | prismatic                                                     | orthorhombic                                                  | orthorhombic                                                  |
| Space group                        | P2(1)/n                                                       | P212121                                                       | C2/c                                                          |
| Unit cell dimension a (Å)          | 9.2440(11)                                                    | 9.973(4)                                                      | 19.5864(18)                                                   |
| b (Å)                              | 21.127(3)                                                     | 12.164(4)                                                     | 12.1795(11)                                                   |
| c (Å)                              | 10.5457(12)                                                   | 21.090(7)                                                     | 15.8503(15)                                                   |
| α (°)                              | 90.00                                                         | 90.00                                                         | 90.00                                                         |
| β (°)                              | 114.609(2)                                                    | 90.00                                                         | 93.133(2)                                                     |
| γ (°)                              | 90.00                                                         | 90.00                                                         | 90.00                                                         |
| Volume                             | 1871.3(4)                                                     | 2558.3(16)                                                    | 3775.5(6)                                                     |
| z                                  | 4                                                             | 4                                                             | 8                                                             |
| Density calc. (g/cm <sup>3</sup> ) | 1.372                                                         | 1.326                                                         | 1.458                                                         |
| Goodness of fit on p <sup>2</sup>  | 0.973                                                         | 1.016                                                         | 1.024                                                         |
| Final R1                           | 0.0596                                                        | 0.0419(2991)                                                  | 0.0378(3365)                                                  |
| wR2(I>2S(I))                       | 0.1395(3462)                                                  | 0.0906(4187)                                                  | 0.1039(4295)                                                  |
| R1 (all data)                      | 0.0915                                                        | 0.0716                                                        | 0.0527                                                        |
| wR2 (all data)                     | 0.1267                                                        | 0.0795                                                        | 0.0953                                                        |

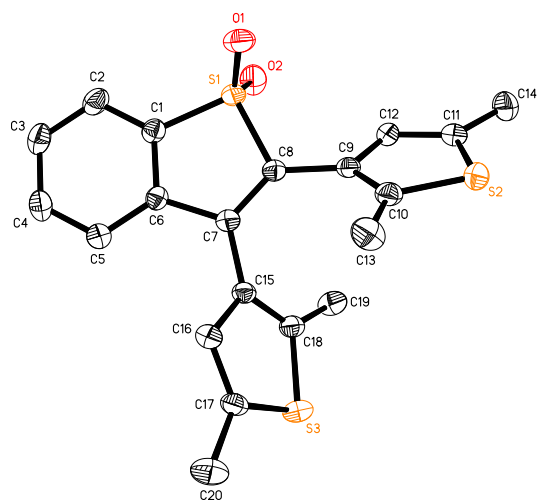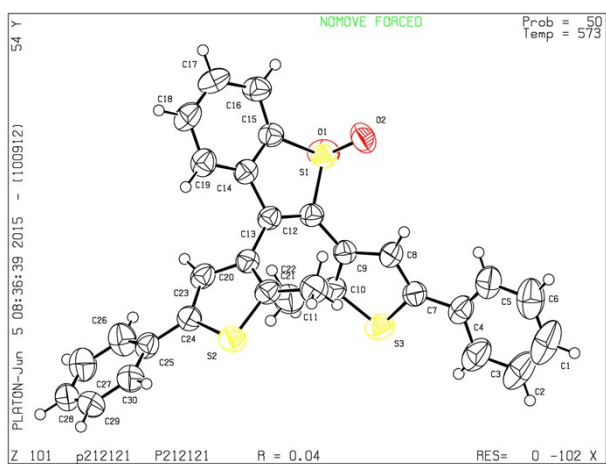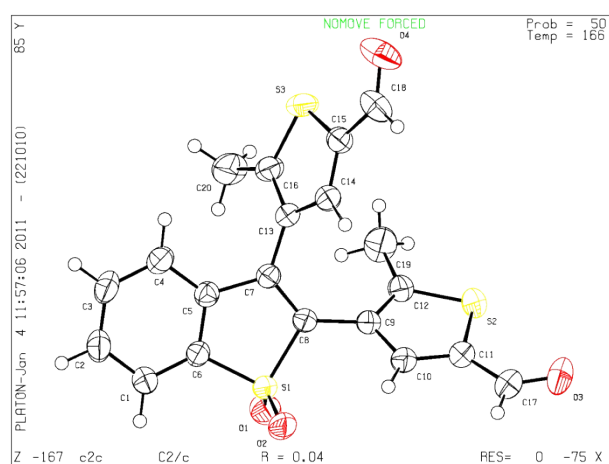

**Fig. S2** ORTEP drawings showing 50% probability displacement ellipsoids: (A) BTT-1, (B) BTT-2, and (c) BTT-3.

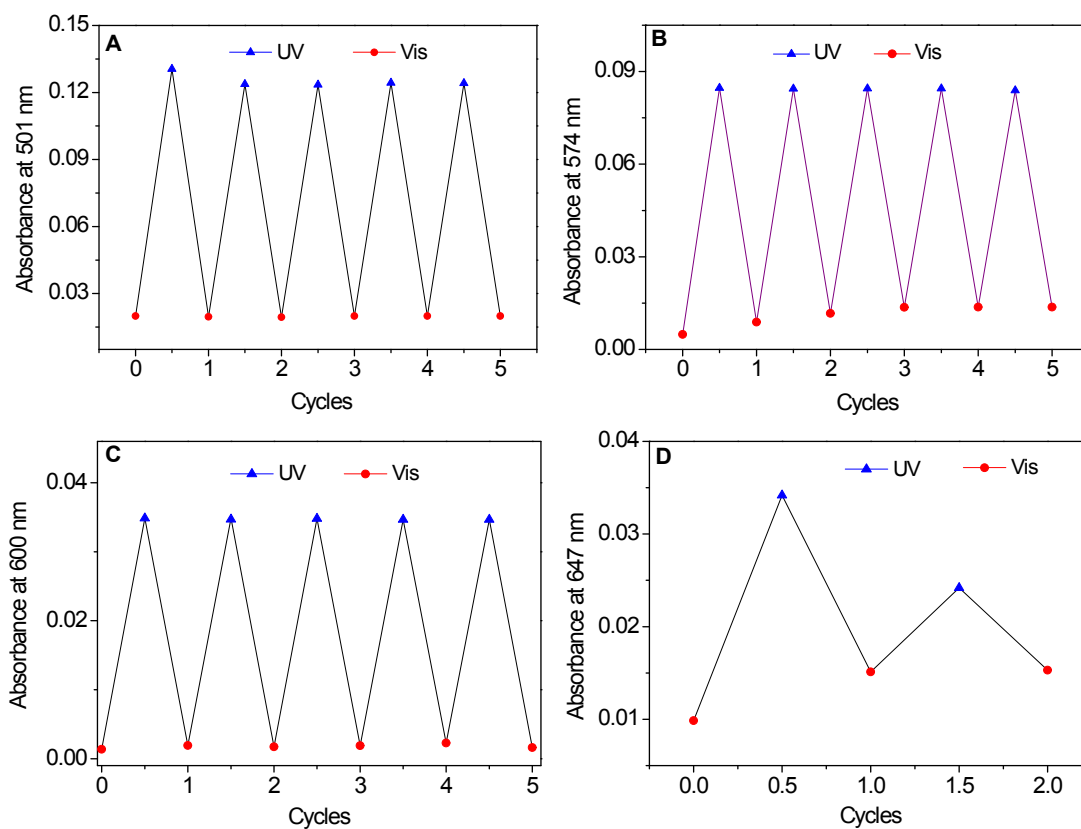

**Fig. S3** (A) Changes in the absorbance of PMMA films upon alternative irradiation with UV (365 nm) and visible light (>450 nm) light; (A) PMMA-BTT-1, (B) PMMA-BTT-2, (C) PMMA-BTT-3, and (D) PMMA-BTT-4.

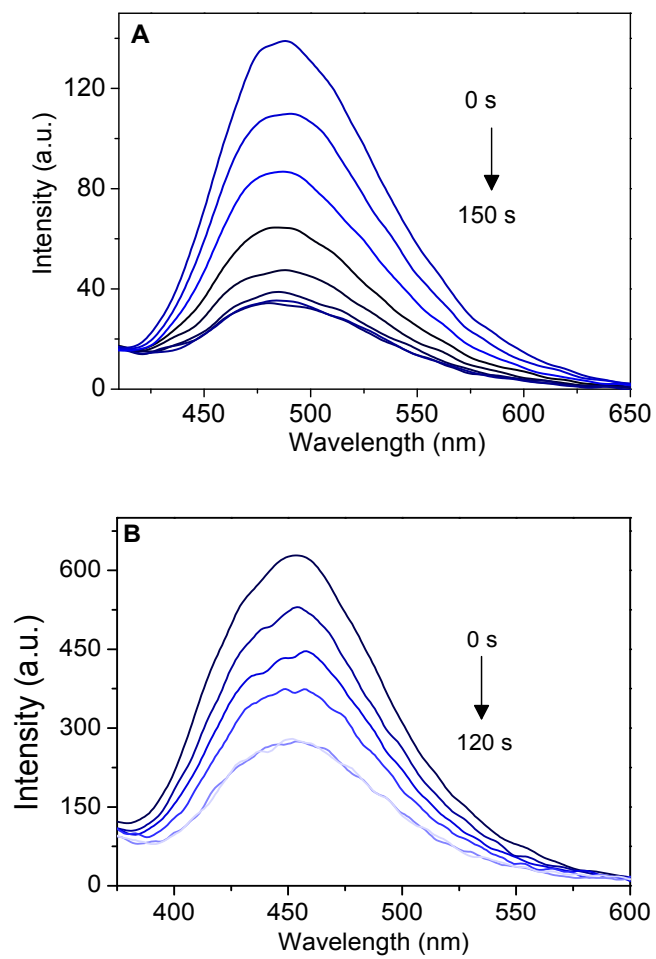

**Fig. S4** Fluorescence spectra changes upon UV irradiation at 365 nm with the excitation at the isobestic point in ethyl acetate: (A) BTT-2,  $2.15 \times 10^{-5} \text{ mol L}^{-1}$  and (B) BTT-3,  $2.10 \times 10^{-5} \text{ mol L}^{-1}$



Fig. S5-S16 NMR(<sup>1</sup>H, <sup>13</sup>C) spectra and High resolution mass spectrum of BTT-1 to BTT-4

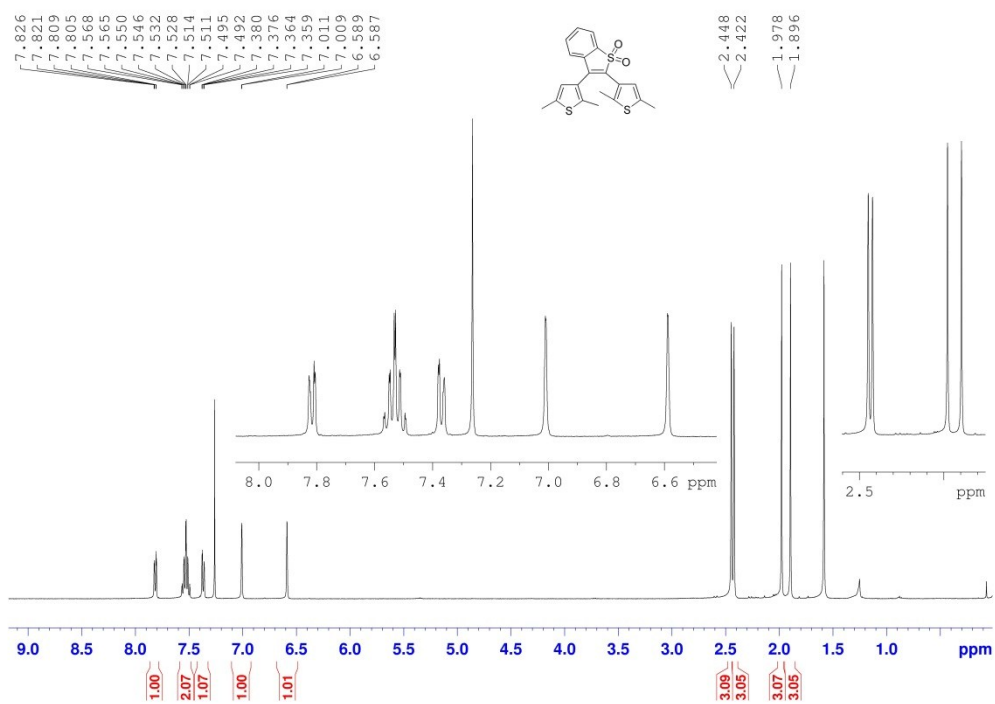

Fig. S5 <sup>1</sup>H NMR spectra of BTT-1 in CDCl<sub>3</sub> (400 MHz)

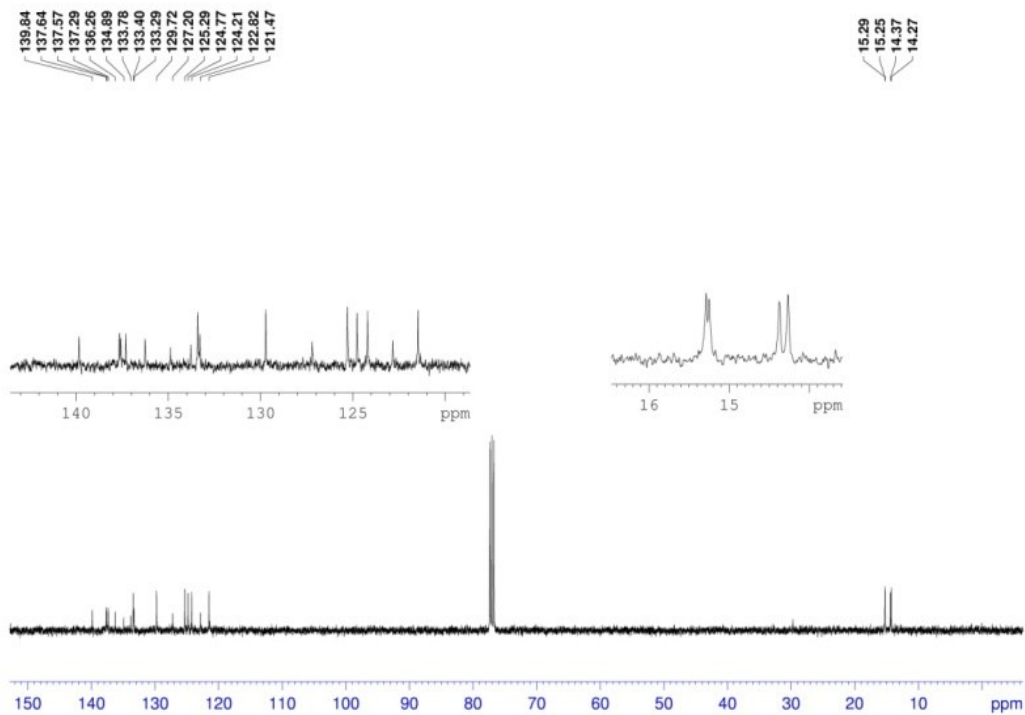

Fig. S6 <sup>13</sup>C NMR spectrum of BTT-1 in CDCl<sub>3</sub> (100 MHz)

## Single Mass Analysis

Tolerance = 2.0 mDa / DBE: min = -1.5, max = 50.0

Element prediction: Off

Number of isotope peaks used for i-FIT = 4

Monoisotopic Mass, Even Electron Ions

367 formula(e) evaluated with 4 results within limits (up to 1 best isotopic matches for each mass)

Elements Used:

C: 20-32 H: 0-1000 O: 0-40 S: 0-3 K: 0-1

ZHU-WH

LCT Premier

Key Lab for Advanced Materials -- ECUST

1: TOF MS ES+

7.93e+003

ZWH-CSJ-03 27 (0.841) Cm (18:31)

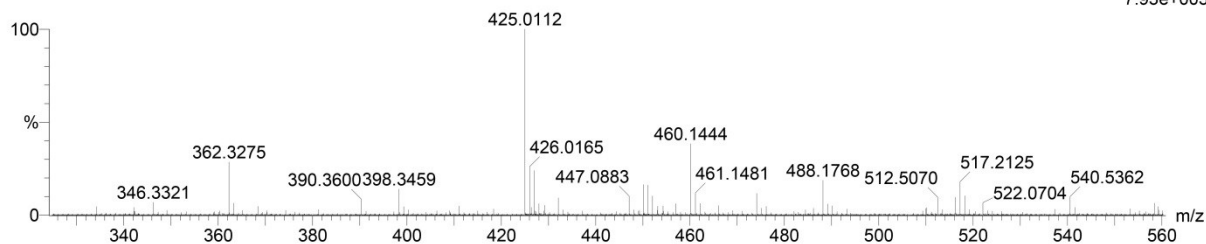

Minimum: -1.5  
Maximum: 2.0 5.0 50.0

| Mass     | Calc. Mass | mDa | PPM | DBE  | i-FIT | i-FIT (Norm) | Formula         |
|----------|------------|-----|-----|------|-------|--------------|-----------------|
| 425.0112 | 425.0106   | 0.6 | 1.4 | 11.5 | 409.0 | 0.0          | C20 H18 O2 S3 K |

Fig. S7 High resolution mass spectrum of BTT-1

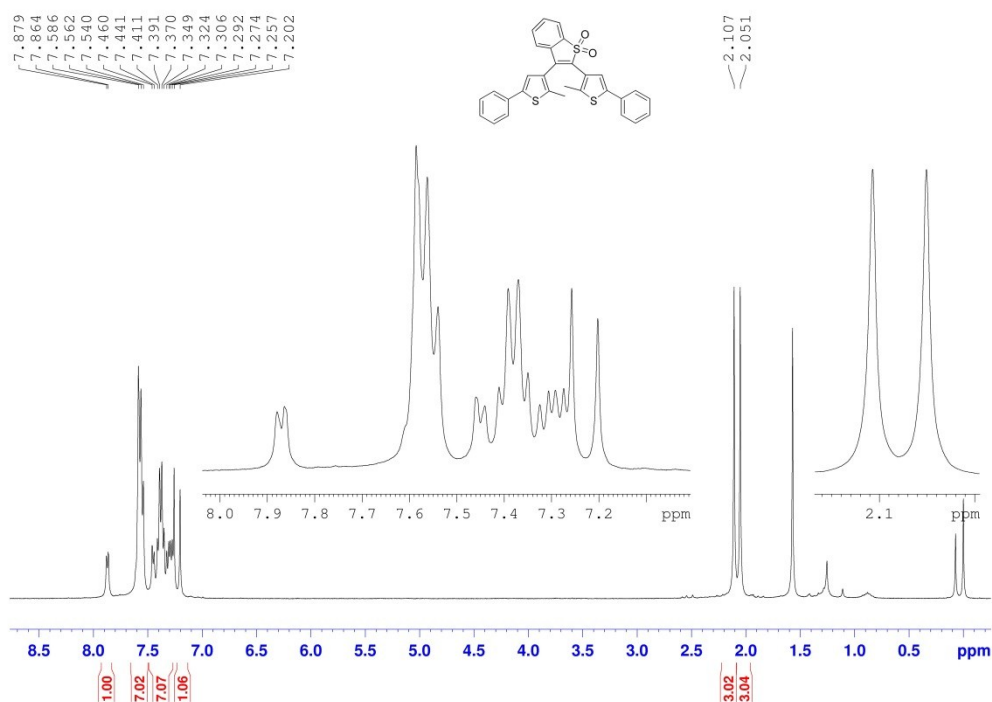Fig. S8 <sup>1</sup>H NMR spectra of BTT-2 in CDCl<sub>3</sub> (400 MHz)

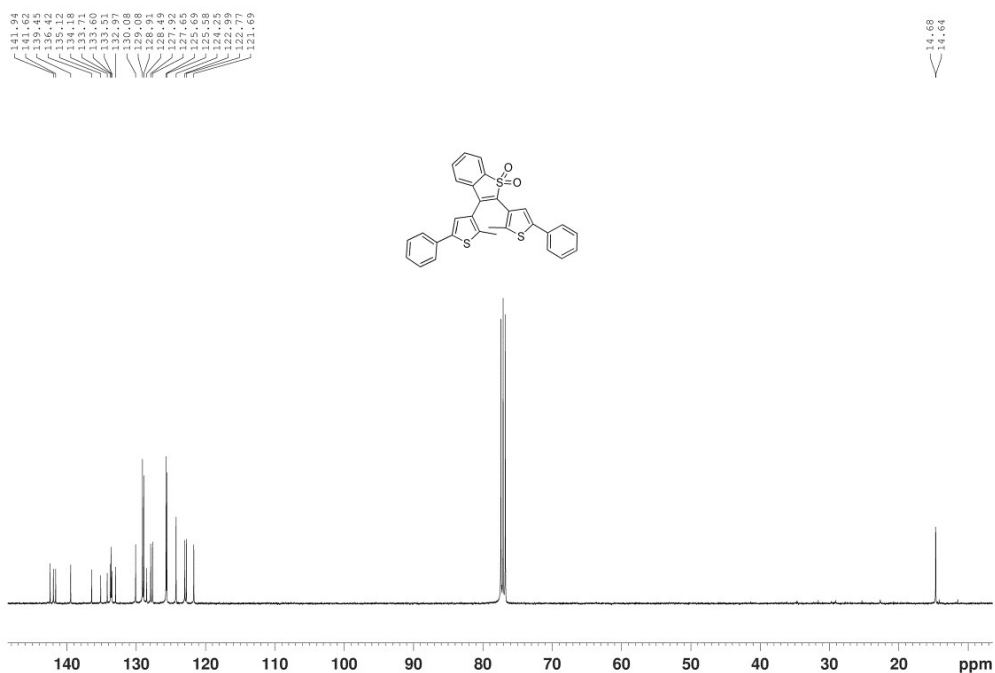

Fig. S9 <sup>13</sup>C NMR spectrum of BTT-2 in CDCl<sub>3</sub> (100 MHz)

### Elemental Composition Report

Page 1

#### Single Mass Analysis

Tolerance = 3.0 mDa / DBE: min = -1.5, max = 50.0

Element prediction: Off

Number of isotope peaks used for i-FIT = 2

Monoisotopic Mass, Even Electron Ions

19 formula(e) evaluated with 1 results within limits (up to 1 best isotopic matches for each mass)

Elements Used:

C: 0-30 H: 0-23 O: 0-2 S: 0-3 K: 0-1

ZHU-WH

ZWH-CSJ-13 11 (0.421) Cm (10:28)

1: TOF MS ES+  
1.45e+004

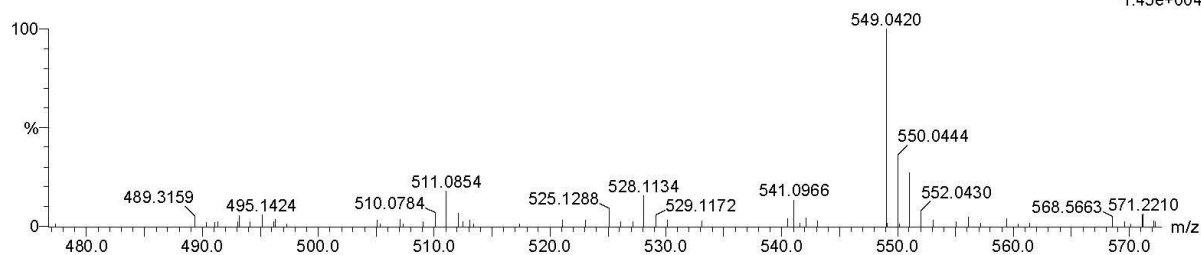

Minimum:

Maximum: 3.0 10.0 50.0

| Mass | Calc. Mass | mDa | PPM | DBE | i-FIT | i-FIT (Norm) | Formula |
|------|------------|-----|-----|-----|-------|--------------|---------|
|------|------------|-----|-----|-----|-------|--------------|---------|

|          |          |     |     |      |      |     |                 |
|----------|----------|-----|-----|------|------|-----|-----------------|
| 549.0420 | 549.0419 | 0.1 | 0.2 | 19.5 | 28.5 | 0.0 | C30 H22 O2 S3 K |
|----------|----------|-----|-----|------|------|-----|-----------------|

Fig. S10 High resolution mass spectrum of BTT-2

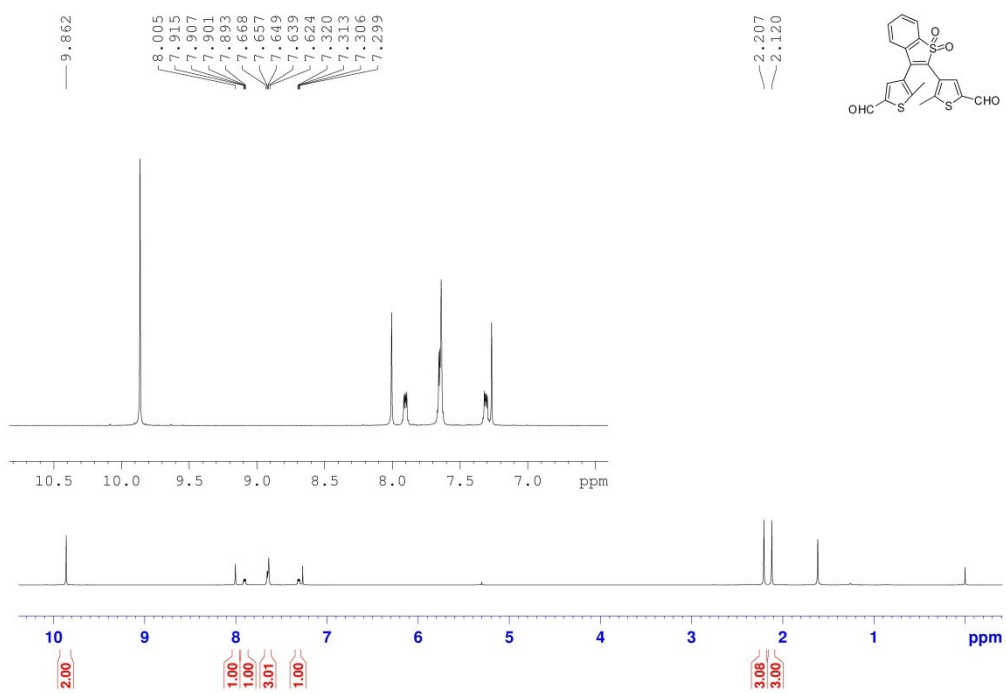

Fig. S11 <sup>1</sup>H NMR spectra of BTT-3 in CDCl<sub>3</sub> (400 MHz)

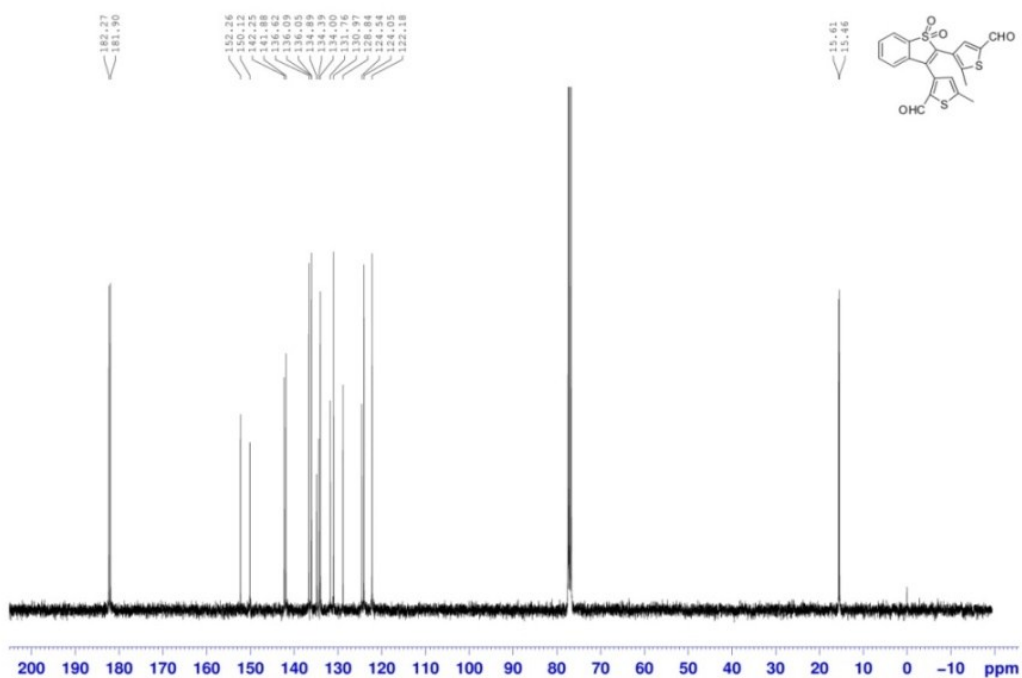

Fig. S12 <sup>13</sup>C NMR spectrum of BTT-3 in CDCl<sub>3</sub> (100 MHz)

## Elemental Composition Report

### Single Mass Analysis

Tolerance = 50.0 mDa / DBE: min = -1.5, max = 100.0

Element prediction: Off

Number of isotope peaks used for i-FIT = 2

Monoisotopic Mass, Even Electron Ions

47 formula(e) evaluated with 15 results within limits (up to 1 closest results for each mass)

Elements Used:

C: 0-26 H: 0-30 O: 4-6 S: 0-3 K: 0-1

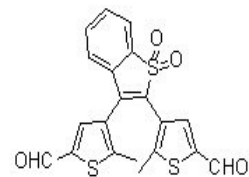

WH-ZHU

ECUST institute of Fine Chem

12-Jun-2012

18:35:09

1: TOF MS ES+

1.08e+003

ZWH-CSJ-50 20 (0.692) Cm (18:20)

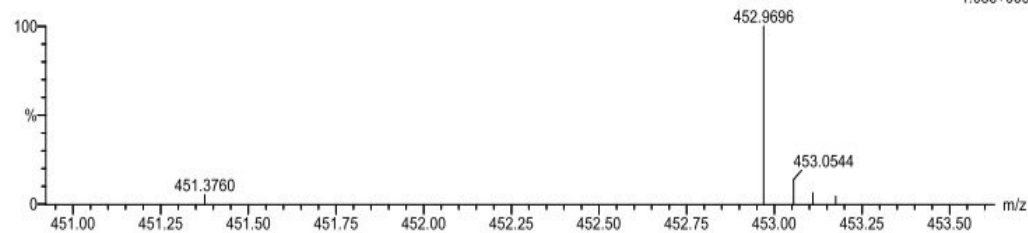

Minimum: 50.0 50.0 -1.5  
Maximum: 50.0 50.0 100.0

| Mass     | Calc. Mass | mDa | PPM | DBE  | i-FIT | i-FIT (Norm) | Formula         |
|----------|------------|-----|-----|------|-------|--------------|-----------------|
| 452.9696 | 452.9691   | 0.5 | 1.1 | 13.5 | 46.4  | 0.0          | C20 H14 O4 S3 K |

Fig. S13 High resolution mass spectrum of BTT-3

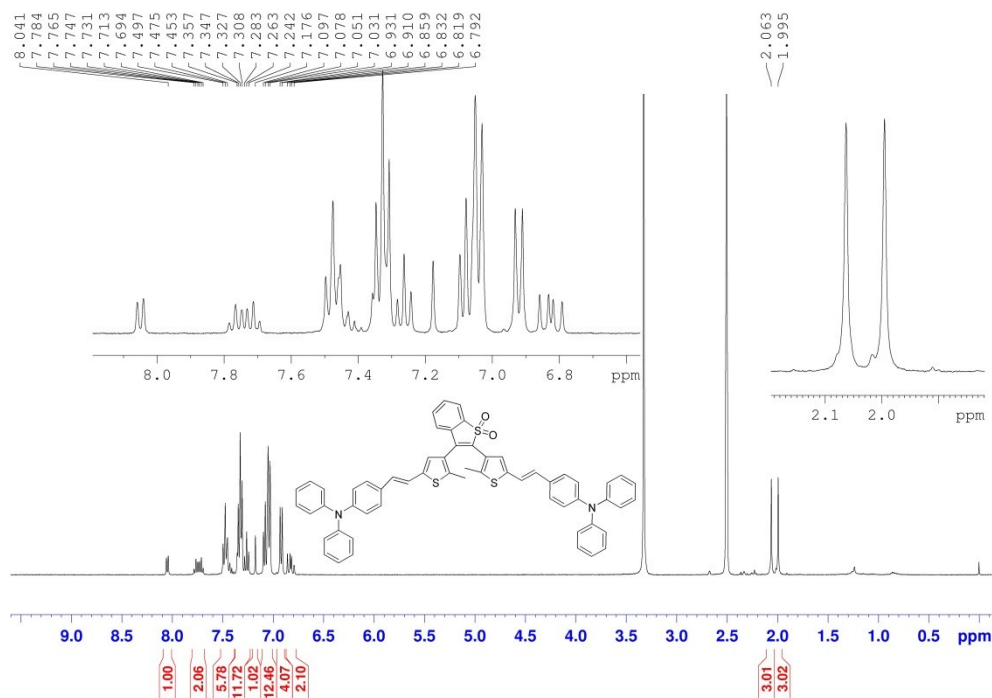

Fig. S14  $^1\text{H}$  NMR spectra of BTT-4 in  $\text{DMSO-}d_6$  (400 MHz)

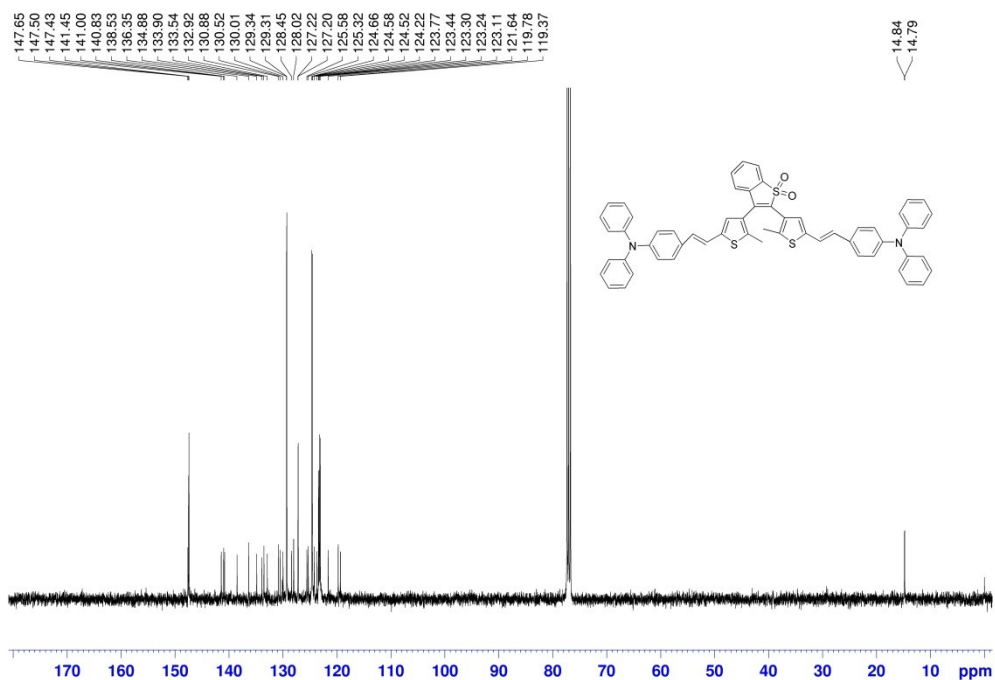

Fig. S15 <sup>13</sup>C NMR spectrum of BTT-4 in CDCl<sub>3</sub> (100 MHz)

Elemental Composition Report

Single Mass Analysis

Tolerance = 3.0 mDa / DBE: min = -1.5, max = 50.0  
 Element prediction: Off  
 Number of isotope peaks used for i-FIT = 3

Monoisotopic Mass, Even Electron Ions

68428 formula(e) evaluated with 219 results within limits (up to 1 best isotopic matches for each mass)

Elements Used:

C: 27-58 H: 0-1000 N: 0-200 O: 0-200 S: 0-6 K: 0-1

WU-XY

LCT Premier

ZWH-CSJ-01 18 (0.724) Cm (7:25)

Key Lab for Advanced Materials --- ECUST  
 1: TOF MS ES+  
 1.29e+004

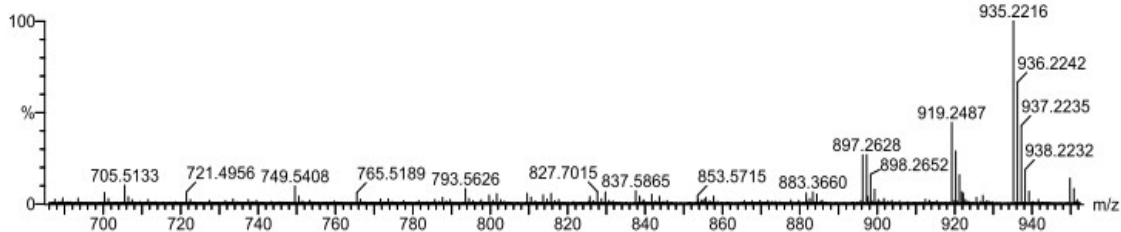

Minimum: -1.5  
 Maximum: 3.0 50.0 50.0

| Mass     | Calc. Mass | mDa | PPM | DBE  | i-FIT | i-FIT (Norm) | Formula            |
|----------|------------|-----|-----|------|-------|--------------|--------------------|
| 935.2216 | 935.2202   | 1.4 | 1.5 | 37.5 | 207.9 | 0.0          | C58 H44 N2 O2 S3 K |

Fig. S16 High resolution mass spectrum of BTT-4
